# Supplementary material for: Institutional and Demographic factors associated with the utilization of health informatics systems in Sagnarigu Municipality
Source: Research Square preprint supplement (doi:10.21203/rs.3.rs-6501120/v1), 2025-05-30
Supplement: Supplementary file 1 [file ac125aff281d572278da7730.pdf]

## SURVEY QUESTIONNAIRE

### UNIVERSITY FOR DEVELOPMENT STUDIES

### SCHOOL OF PUBLIC HEALTH

### DEPARTMENT EPIDEMIOLOGY, BIOSTATISTICS AND DISEASE CONTROL

I am a final year *MPH (Public Health Informatics)* student and I sincerely appreciate your willingness to participate in this study. This study is *to assess the Factors associated with unitization of Health Informatics Systems in Sagnerigu Municipality*. Your valuable insights will contribute significantly to the quality of healthcare delivery

#### Section 1: Demographic Information

1. What is your gender? Male( ☐ ) Female( ☐ )
2. What is your age? .....
3. Marital Status? Married( ☐ ) Single( ☐ )
4. What is your qualification? Certificate( ☐ ) Diploma( ☐ ) Degree Master's degree( ☐ ) PhD( ☐ )
5. What category of staff are you? Junior Staff ( ☐ ) Senior Staff( ☐ )
6. Which department do you work? Clinical Staff( ☐ ) Non-clinical( ☐ )
7. What is your current Grade/Rank? Staff Nurse( ☐ ) Senior Staff Nurse( ☐ ) Nursing Officer( ☐ ) Senior Nursing Officer( ☐ ) Enrolled Nurse( ☐ ) Senior Enrolled Nurse( ☐ ) Principal Enrolled Nurse( ☐ ) Staff Midwife( ☐ ) Senior Staff Midwife( ☐ ) Others(Specify) .....
8. Which Sub-municipality do you work? Taha( ☐ ) Kamina ( ☐ ) Choggu( ☐ ) Sagnerigu( ☐ ) Malshegu( ☐ ) Garizegu( ☐ )
9. Which facility do you work for?.....
10. How long have you been working in this facility?.....
11. How long have been working in general(years)? *Please refer to your first appointment*
12. which Health Informatics System do your use in your facility? HELIX( ☐ ) LHIMS ( ☐ ) HAMS( ☐ ) PHIMS( ☐ ) CLAIMIT( ☐ ) Others(Specify).....

## Section 2: Personal Utilization of Health Informatics Systems

*Please respond to the following questions regarding your utilization of Health Informatics Systems*

| S/N | Statement                                     | Yes | No |
|-----|-----------------------------------------------|-----|----|
| 13  | Do you have user logins for your system?      |     |    |
| 14  | Do you use HIS to monitor daily activities?   |     |    |
| 15  | Do you use HIS for providing service?         |     |    |
| 16  | Do you use HIS for-patient record management? |     |    |
| 17  | Do you generate health reports from HIS?      |     |    |
| 18  | Overall, I am satisfied with HIS utilization. |     |    |

## Section 3: Facility Utilization of Health Informatics Systems

*Please respond to the following questions regarding your knowledge of utilization of Health Informatics Systems in the following department in your facility*

| No. | Statement                                    | Yes | No |
|-----|----------------------------------------------|-----|----|
| 19  | Do you use HIS in the records department?    |     |    |
| 20  | Do you use HIS at opd?                       |     |    |
| 21  | Do you use HIS at IPD?                       |     |    |
| 22  | Do you use HIS at CWC?                       |     |    |
| 23  | Do you use HIS for PNC services?             |     |    |
| 24  | Do you use HIS for FP services?              |     |    |
| 25  | Do you use HIS for ANC services?             |     |    |
| 26  | Do you use HIS in the laboratory department? |     |    |
| 27  | Do you use HIS in the consulting rooms?      |     |    |

|    |                                                   |  |  |
|----|---------------------------------------------------|--|--|
| 28 | Do you use HIS in the pharmacy department?        |  |  |
| 29 | Do you use HIS in the disease control activities? |  |  |

#### **Section 4: Personal factors Associated with Utilization of HIS**

*Please indicate to what extent you agree or disagree with the following statements regarding Personal factors Associated with Utilization of Health Informatics systems by selecting the appropriate response: (1 = Strongly Disagree, 2 = Disagree, 3 Neutral 4 = Agree, 5 = Strongly Agree*

| <b>S/N</b> | <b>Statement</b>                                | <b>1</b> | <b>2</b> | <b>3</b> | <b>4</b> | <b>5</b> |
|------------|-------------------------------------------------|----------|----------|----------|----------|----------|
| 30         | I feel confident using HIS.                     |          |          |          |          |          |
| 31         | I am comfortable with technology.               |          |          |          |          |          |
| 32         | HIS improves my work efficiency.                |          |          |          |          |          |
| 33         | Data security in HIS is important to me.        |          |          |          |          |          |
| 34         | HIS is essential for my job.                    |          |          |          |          |          |
| 35         | I receive adequate HIS support from colleagues. |          |          |          |          |          |
| 36         | I regularly update my HIS skills.               |          |          |          |          |          |
| 37         | HIS enhances patient care.                      |          |          |          |          |          |
| 38         | I recommend HIS to other providers.             |          |          |          |          |          |
| 39         | HIS contributes to my professional growth.      |          |          |          |          |          |
| 40         | I lack general computer competence.             |          |          |          |          |          |
| 41         | I lack HIS knowledge.                           |          |          |          |          |          |
| 42         | I have too much workload.                       |          |          |          |          |          |
| 43         | There is poor communication between users.      |          |          |          |          |          |

### Section 5: Institutional factors Associated with Utilization of HIS

*Please indicate to what extent you agree or disagree with the following statements regarding Institutional factors Associated with Utilization of Health Informatics systems by selecting the appropriate response: (1 = Strongly Disagree, 2 = Disagree, 3 = Neutral 4= Agree, 5= Strongly Agree*

| No. | Statement                                        | 1 | 2 | 3 | 4 | 5 |
|-----|--------------------------------------------------|---|---|---|---|---|
| 44  | Adequate HIS training is provided.               |   |   |   |   |   |
| 45  | User-friendly HIS software is in use.            |   |   |   |   |   |
| 46  | HIS usage is encouraged and incentivized.        |   |   |   |   |   |
| 47  | HIS usage is monitored and evaluated.            |   |   |   |   |   |
| 48  | Leadership supports HIS implementation.          |   |   |   |   |   |
| 49  | HIS is regularly updated and improved.           |   |   |   |   |   |
| 50  | Adequate resources for HIS usage are provided.   |   |   |   |   |   |
| 51  | Policies ensure data security in HIS.            |   |   |   |   |   |
| 52  | Effective communication on HIS updates exists.   |   |   |   |   |   |
| 53  | Rewards are given for effective HIS utilization. |   |   |   |   |   |

### Section 6: Technical factors Associated with Utilization of HIS

*Please indicate to what extent you agree or disagree with the following statements regarding technical factors Associated with Utilization of Health Informatics systems by selecting the appropriate response: (1 = Strongly Disagree, 2 = Disagree, 3 = Neutral 4=Agree, 5 = Strongly Agree*

| No. | Statement                                  | 1 | 2 | 3 | 4 | 5 |
|-----|--------------------------------------------|---|---|---|---|---|
| 54  | HIS is easy to navigate.                   |   |   |   |   |   |
| 55  | HIS is compatible with various devices.    |   |   |   |   |   |
| 56  | HIS provides quick access to patient info. |   |   |   |   |   |

|    |                                                       |  |  |  |  |  |
|----|-------------------------------------------------------|--|--|--|--|--|
| 57 | HIS is reliable and rarely encounters issues.         |  |  |  |  |  |
| 58 | HIS integrates well with other systems.               |  |  |  |  |  |
| 59 | HIS facilitates effective provider communication.     |  |  |  |  |  |
| 60 | HIS offers useful clinical decision support features. |  |  |  |  |  |
| 61 | HIS allows customization for provider needs.          |  |  |  |  |  |
| 62 | HIS technical support is readily available.           |  |  |  |  |  |
| 63 | HIS ensures data confidentiality and security.        |  |  |  |  |  |
| 64 | Overall, HIS is user-friendly and efficient.          |  |  |  |  |  |

65. Will you recommend switching from your current system to a different system?

Yes( ) No( )

66. If yes, please specify.....
